# Supplementary material for: The humoral response to BK polyomavirus in kidney transplant recipients is dominated by IgM antibodies that use a distinct repertoire compared to IgG against the same antigen
Source: bioRxiv or medRxiv preprint supplement (doi:10.1101/2021.02.04.21250913), 2021-02-09

## Supplementary Table 1:

### Combinatorial sample barcoding

| Patient | Patient-specific antibodies | Timepoint-specific antibodies |             |             |             |
|---------|-----------------------------|-------------------------------|-------------|-------------|-------------|
|         |                             | Timepoint 1                   | Timepoint 2 | Timepoint 3 | Timepoint 4 |
| 2.6     | Hashtag 1                   | anti-CD11a                    | anti-CD18   | anti-CD45   |             |
| 3.1     | Hashtag 2                   | anti-CD11a                    | anti-CD18   | anti-CD45   | anti-CD20   |
| 3.12    | anti-HLA-ABC                | anti-CD11a                    | anti-CD18   |             |             |
| 3.2     | anti-HLA-DR                 | anti-CD11a                    | anti-CD18   |             |             |
| 3.3     | Hashtag 4                   | anti-CD11a                    | anti-CD18   | anti-CD45   |             |
| 3.4     | Hashtag 5                   | anti-CD11a                    | anti-CD18   | anti-CD45   |             |

\* *Barcoded antibodies against human surface antigens with TotalSeq C oligonucleotides, specifically compatible with the Single Cell 5' workflow of 10X Genomics.*

# Supplementary Figure 1:

Binding of fluorescence-labeled BKPyV VLPs to B cells from healthy donor, seronegative KTx, seropositive KTx

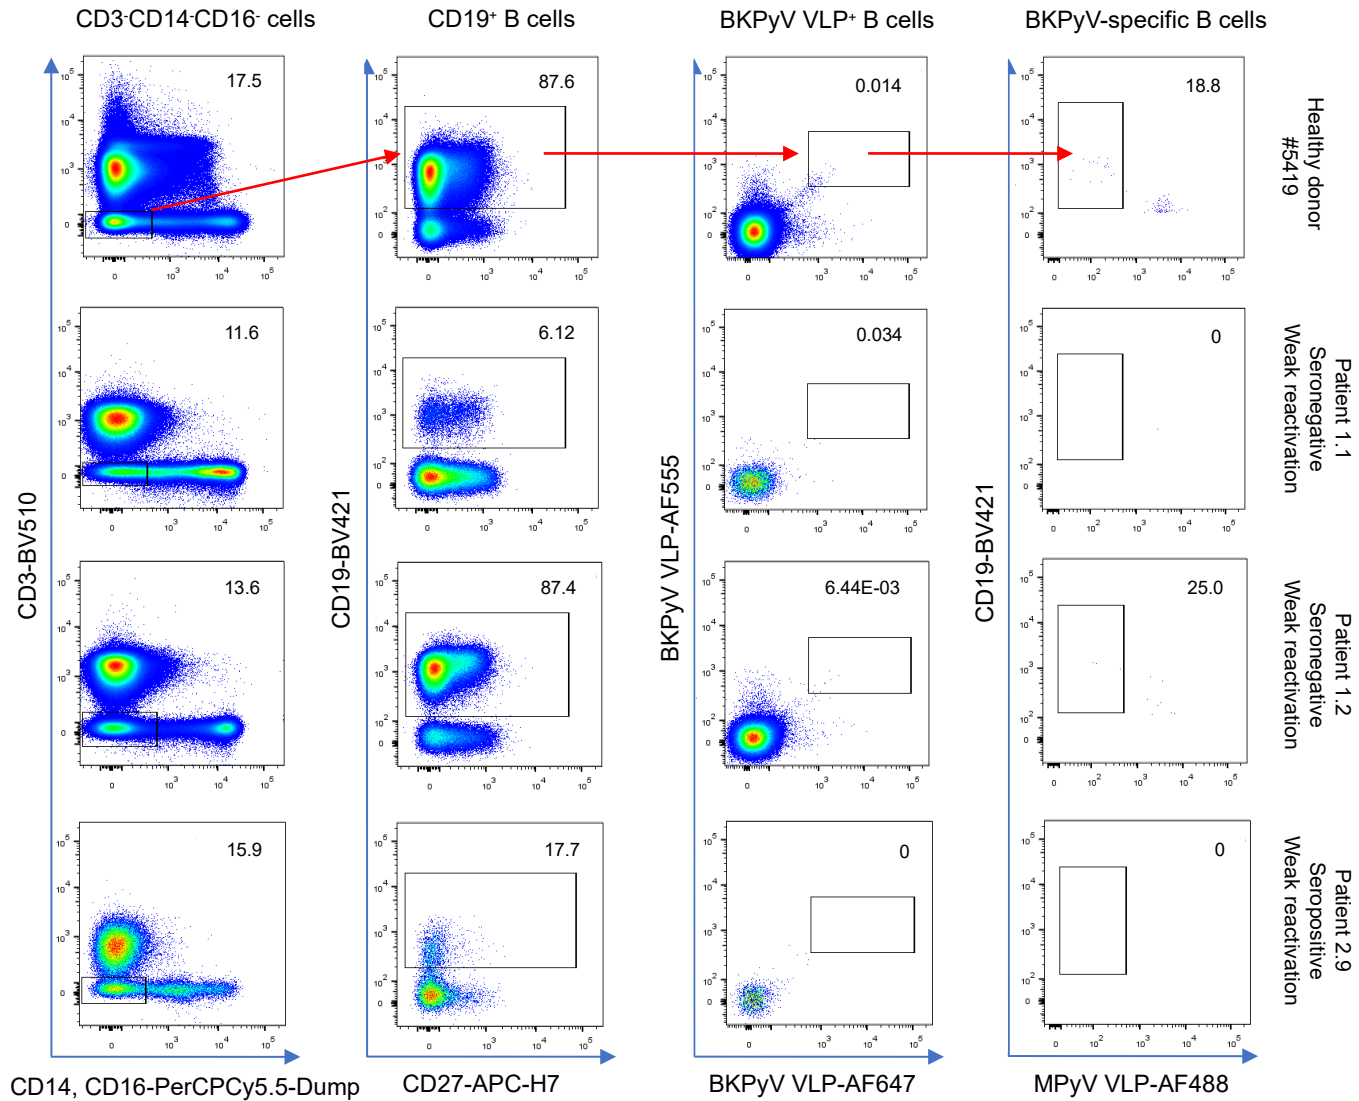

# Supplementary Figure 2- Viral load, neutralizing antibody titres, and summary clinical data of patients selected for scRNA seq experiment

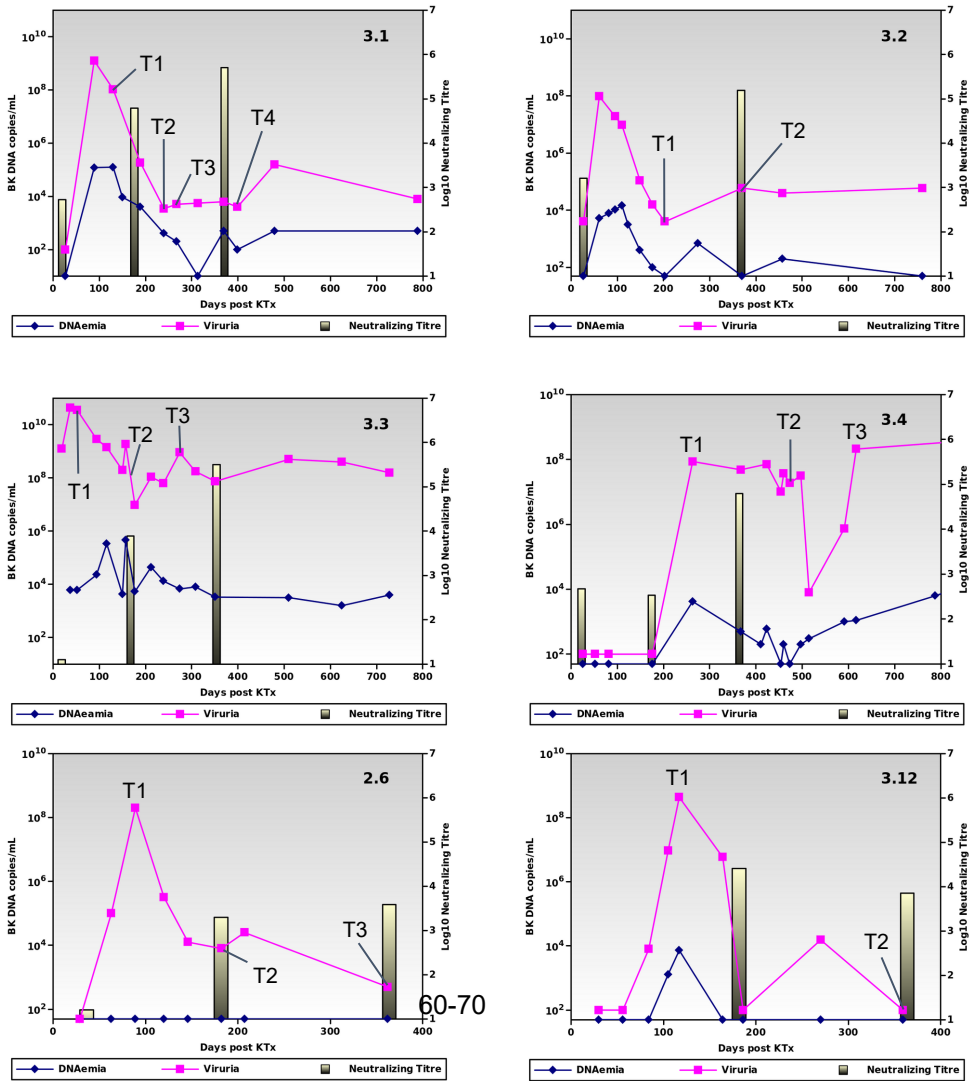

| Patient | Sex | Age at KTx | BKPyV genotype |
|---------|-----|------------|----------------|
| 3.1     | F   | 60-70      | Ib2            |
| 3.2     | M   | 60-70      | Ib2            |
| 3.3     | M   | 60-70      | IV             |
| 3.4     | M   | 60-70      | Ib2            |
| 2.6     | F   | 50-60      | Ib1            |
| 3.12    | M   | 50-60      | Ib2            |

# Supplementary Figure 3: Heavy and light chain v-gene usage in total and BKPv-specific B-cells

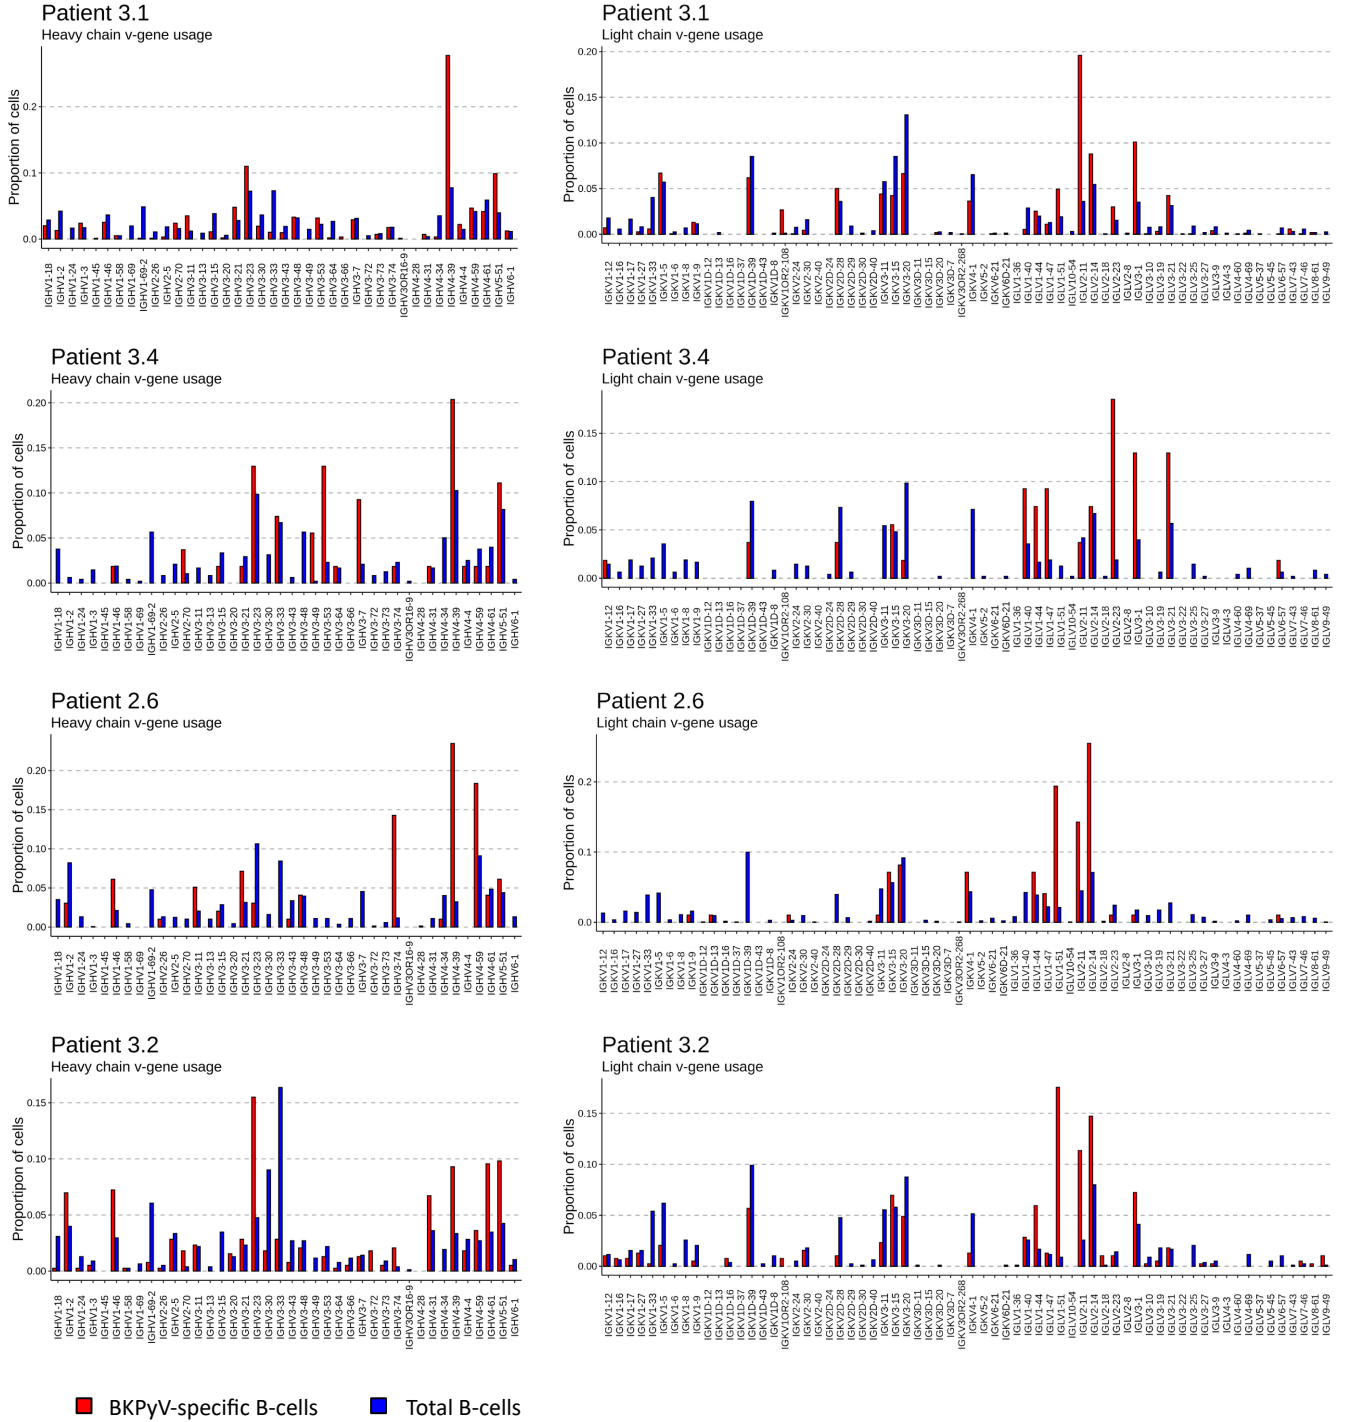

# Supplementary Figure 4:

Binding of fluorescence-labeled BKPyV VLPs to susceptible 293TT cells

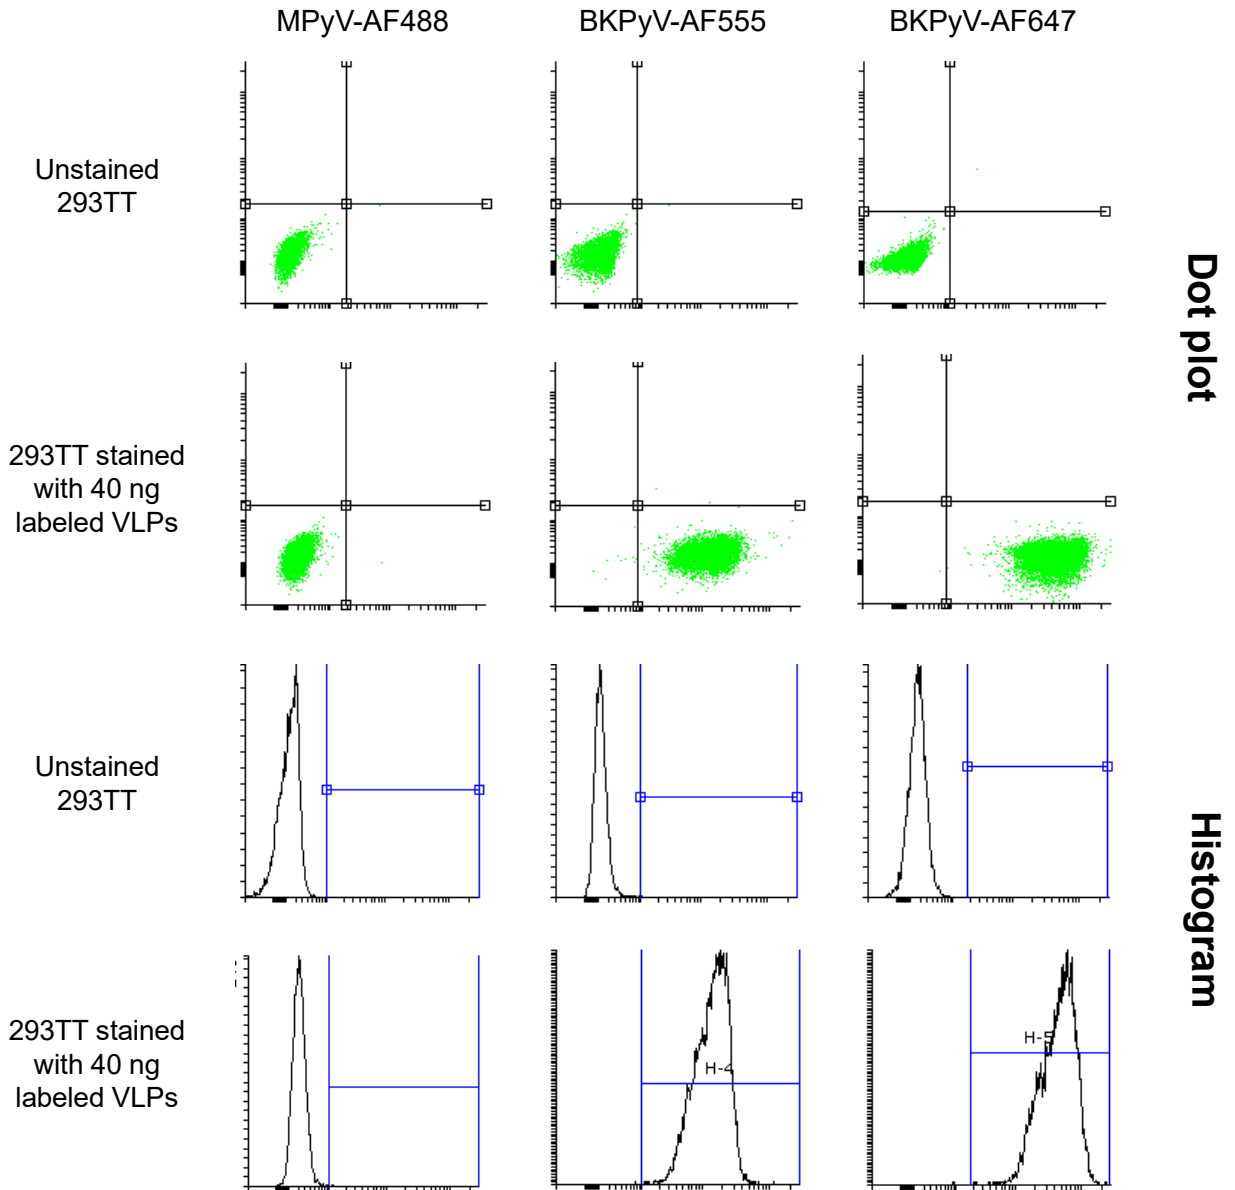

Supplement: Supplementary file [file media-1.pdf]
